# Supplementary material
Source: Springer Nature journal article supplement (https://www.springermedizin.de/resource/supplementary/13000_2011_361_MOESM1_ESM.pdf/9624430)

## Mean Claudin-3 Staining Intensity by Prostatic Tissue Type

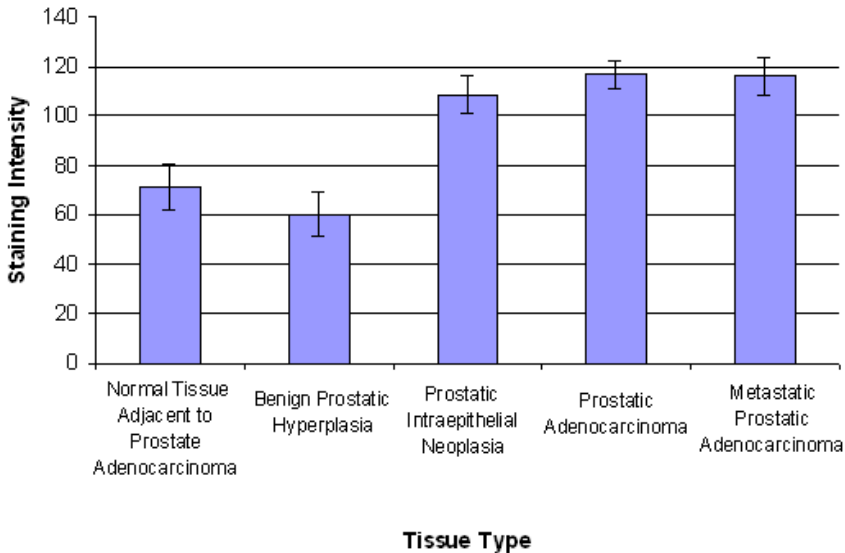

Supplement: MOESM1 [file 9624430]
